# Supplementary material for: Nocturnal Blood Pressure Estimation from Sleep Plethysmography Using Machine Learning
Source: Sensors (Basel). 2023 Sep 16;23(18):7931. doi: 10.3390/s23187931 (PMC10537552; doi:10.3390/s23187931)
Supplement: Supplementary file 1 [file sensors-23-07931-s001.zip › sensors-2605200-supplementary.pdf]

## Supplementary Material

### Article

# Nocturnal Blood Pressure Estimation from Sleep Plethysmography Using Machine Learning

Gizem Yilmaz <sup>1,†</sup>, Xingyu Lyu <sup>1,2,†</sup>, Ju Lynn Ong <sup>1</sup>, Lieng Hsi Ling <sup>3,4</sup>, Thomas Penzel <sup>5</sup>, B. T. Thomas Yeo <sup>1,2,6,7,8,9,\*</sup>  
and Michael W. L. Chee <sup>1,\*</sup>

- <sup>1</sup> Centre for Sleep and Cognition, Yong Loo Lin School of Medicine, National University of Singapore, Singapore; gizem.yilmaz@nus.edu.sg (G.Y.); lyux96@nus.edu.sg (X.L.); julynn.ong@nus.edu.sg (J.L.O.)
- <sup>2</sup> Centre for Translational Magnetic Resonance Research (TMR), Yong Loo Lin School of Medicine, National University of Singapore, Singapore
- <sup>3</sup> National University Heart Centre, Singapore; mdcllh@nus.edu.sg (L.H.L.)
- <sup>4</sup> Department of Medicine, Yong Loo Lin School of Medicine, National University of Singapore, Singapore
- <sup>5</sup> Interdisciplinary Center of Sleep Medicine, Charité—Universitätsmedizin Berlin, Berlin, Germany; thomas.penzel@charite.de (T.P.)
- <sup>6</sup> Department of Electrical and Computer Engineering, National University of Singapore, Singapore
- <sup>7</sup> N.1 Institute for Health and Institute for Digital Medicine (WisDM), National University of Singapore, Singapore
- <sup>8</sup> Integrative Sciences and Engineering Programme (ISEP), National University of Singapore, Singapore
- <sup>9</sup> Martinos Center for Biomedical Imaging, Massachusetts General Hospital, Charlestown, MA, USA
- \* Correspondence: thomas.yeo@nus.edu.sg (B.T.T.Y.); michael.chee@nus.edu.sg (M.W.L.C.)
- † These authors contributed equally.

44

**Table S1.** The list of PPG waveform features used in prediction models

45

| PPG features and description                               |
|------------------------------------------------------------|
| A1: Area from onset to max slope point                     |
| A2: Area from max slope point to systolic peak             |
| A3: Area from systolic peak to dicrotic_notch              |
| A4: Area from dicrotic notch to diastolic peak             |
| A5: Area from onset to offset                              |
| S1: ratio between A1 and A2                                |
| S2: ratio between A1 and A3                                |
| S3: ratio between A1 and A4                                |
| S4: ratio between A1 and A5                                |
| S5: ratio between A2 and A3                                |
| S6: ratio between A2 and A4                                |
| S7: ratio between A2 and A5                                |
| S8: ratio between A3 and A4                                |
| S9: ratio between A3 and A5                                |
| S10: ratio between A4 and A5                               |
| S11: ratio between A1-4 and A5                             |
| AA: Ascending area                                         |
| Daa: Ascending area for first derivative                   |
| sdAA: Ascending area for second derivative                 |
| DA: Descending area                                        |
| dDA: Descending area for first derivative                  |
| sdDA: Descending area for second derivative                |
| RA: ratio between (A1+A2+A3) and A4                        |
| dRA: ratio between dAA and dDA                             |
| sdRA: ratio between sdAA and sdDA                          |
| NA1: Normalized-area from onset to max slope point         |
| NA2: Normalized-area from max slope point to systolic peak |
| NA3: Normalized-area from systolic peak to dicrotic_notch  |
| NA4: Normalized-area from dicrotic notch to diastolic peak |
| NA5: Normalized-area from onset to offset                  |
| NS1: ratio between NA1 and NA2                             |
| NS2: ratio between NA1 and NA3                             |
| NS3: ratio between NA1 and NA4                             |
| NS4: ratio between NA1 and NA5                             |
| NS5: ratio between NA2 and NA3                             |
| NS6: ratio between NA2 and NA4                             |
| NS7: ratio between NA2 and NA5                             |
| NS8: ratio between NA3 and NA4                             |
| NS9: ratio between NA3 and NA5                             |
| NS10: ratio between NA4 and NA5                            |
| NS11: ratio between NA1-4 and NA5                          |
| PI: pulse intensity                                        |
| dPI: pulse intensity for first derivative                  |
| sdPI: pulse intensity for second derivative                |
| dicAmp: dicrotic notch intensity                           |
| AID: onset intensity                                       |
| DID: offset intensity                                      |
| pAmp: pulse average intensity                              |
| RI1: ratio between intensity of max slope point and PI     |

RI2: ratio between NI and PI  
RI3: ratio between intensity of diastolic peak and PI;  
lnRI:  $\log(RI1)$ ;  
lnRI2:  $\log(RI2)$ ;  
lnRI3:  $\log(RI3)$ ;  
AI2: ratio between (PI-NI) and PI;  
ppg\_dc: Mean PPG signal intensity  
ppg\_ac: Intensity between systolic peak and onset  
mNPV1: ratio between ppg\_ac and ppg\_dc  
mNPV2: ratio between ppg\_ac and (ppg\_ac+ppg\_dc);  
CC: Cardiac circle time  
tSA: Ascending time  
tSD: Descending time  
dDT: Descending time for first derivative  
sdDT: Descending time for second derivative  
dTVO: Min of der1 to offset time  
sdTVO: Min of der2 to offset time  
SD: Onset to dicrotic notch time  
DD: Dicrotic notch to offset time  
RSD: ratio between SD and DD;  
RSC: ratio between SD and CC;  
RDC: ratio between DD and CC  
LASI1: inverse of time between dicrotic notch and systolic peak  
LASI2: inverse of time between diastolic peak-systolic peak  
LASI3: inverse of time between diastolic peak-max slope point  
LASI4: inverse of time between systolic peak-max slope point  
HR: heart rate  
lnHR:  $\log$  of heart rate  
expHR:  $\exp$  of heart rate  
SI: stiffness index  
mNPV: modified normalized pulse volume

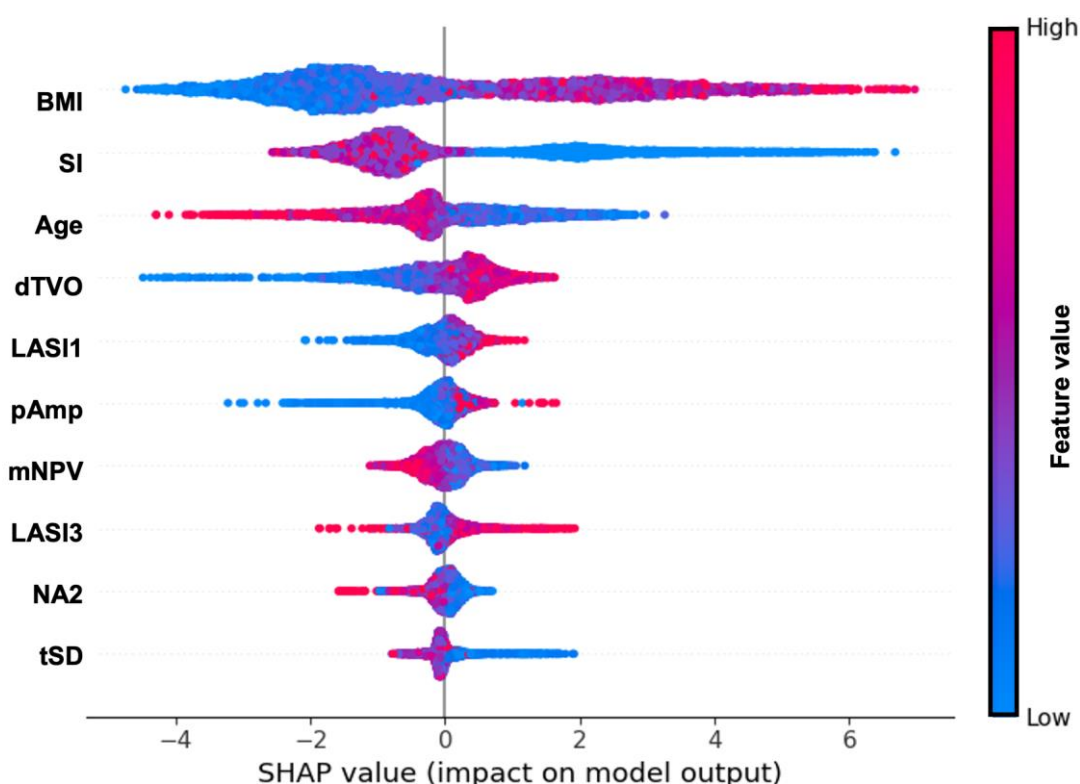

**Figure S1.** Beeswarm plot with 10 most important features including demographic features based on SHAP values: BMI: Body mass index, SI: stiffness index, Age, dTVO: minimum to offset time in first derivative, LASI1: inverse time from diastolic notch to systolic peak, pAmp: pulse amplitude, mNPV: modified normalized pulse volume, LASI3: inverse time from diastolic peak to maximum slope point, NA2: normalized area under maximum slope point to systolic peak, tSD: descending time. Features are ordered according to their importance, from top to bottom. The x-axis represents log odds. Colouring shows the direction of this association, where blue indicates lower values of a given measure and red indicates higher respective measure values.

**Table S2.** Paired comparison of sleep variables on nights without ABPM (ABPMoff) and with ABPM (ABPMon) for participants who had data in both nights (N=45).

| Variable          | ABPMoff, N = 45 | ABPMon, N = 45 | p-value <sup>1</sup> |
|-------------------|-----------------|----------------|----------------------|
| <b>TIB (min)</b>  |                 |                | 0.5                  |
| Mean (SD)         | 456.6 (49.0)    | 459.0 (50.0)   |                      |
| Range             | 330.5, 565.5    | 343.5, 562.5   |                      |
| <b>TST (min)</b>  |                 |                | 0.13                 |
| Mean (SD)         | 404.0 (48.5)    | 391.9 (56.1)   |                      |
| Range             | 306.5, 517.5    | 262.5, 504.0   |                      |
| <b>SOL (min)</b>  |                 |                | 0.5                  |
| Mean (SD)         | 17.8 (12.0)     | 19.1 (15.7)    |                      |
| Range             | 2.5, 52.5       | 0.0, 73.5      |                      |
| <b>WASO (min)</b> |                 |                | 0.043                |

| Variable          | ABPMoff, N = 45 | ABPMon, N = 45 | p-value <sup>1</sup> |
|-------------------|-----------------|----------------|----------------------|
| Mean (SD)         | 30.2 (23.9)     | 42.3 (34.1)    |                      |
| Range             | 2.5, 102.5      | 3.5, 134.5     |                      |
| <b>N3 (min)</b>   |                 |                | <b>0.007</b>         |
| Mean (SD)         | 76.5 (28.2)     | 65.0 (31.2)    |                      |
| Range             | 12.0, 153.5     | 8.5, 131.5     |                      |
| <b>N2 (min)</b>   |                 |                | <b>0.7</b>           |
| Mean (SD)         | 228.2 (36.9)    | 230.1 (35.2)   |                      |
| Range             | 149.5, 309.5    | 142.0, 308.5   |                      |
| <b>N1 (min)</b>   |                 |                | <b>0.013</b>         |
| Mean (SD)         | 13.5 (7.1)      | 17.8 (13.0)    |                      |
| Range             | 1.5, 32.5       | 3.5, 69.5      |                      |
| <b>REM (min)</b>  |                 |                | <b>0.15</b>          |
| Mean (SD)         | 85.9 (35.2)     | 79.0 (28.3)    |                      |
| Range             | 2.0, 153.5      | 18.5, 145.5    |                      |
| <b>NREM (min)</b> |                 |                | <b>0.4</b>           |
| Mean (SD)         | 318.1 (34.0)    | 312.9 (39.8)   |                      |
| Range             | 222.5, 388.5    | 233.0, 389.5   |                      |
| <b>SE (%)</b>     |                 |                | <b>0.036</b>         |
| Mean (SD)         | 88.7 (6.9)      | 85.5 (9.4)     |                      |
| Range             | 70.4, 97.5      | 61.4, 99.1     |                      |

<sup>1</sup>Paired t-test
